# Dynamic trade-offs between biomass accumulation and division determine bacterial cell size and proteome in fluctuating nutrient environments

Josiah C. Kratz<sup>1</sup> and Shiladitya Banerjee<sup>2,\*</sup>

<sup>1</sup>*Department of Biological Sciences, Carnegie Mellon University, Pittsburgh, PA 15213, USA*

<sup>2</sup>*Department of Physics, Carnegie Mellon University, Pittsburgh, PA 15213, USA*

## 1 **Abstract**

2 Bacteria dynamically regulate cell size and growth rate to thrive in changing environments. While much  
3 work has been done to characterize bacterial growth physiology and cell size control during steady-state  
4 exponential growth, a quantitative understanding of how bacteria dynamically regulate cell size and growth  
5 in time-varying nutrient environments is lacking. Here we develop a dynamic coarse-grained proteome  
6 sector model which connects growth rate and division control to proteome allocation in time-varying en-  
7 vironments in both exponential and stationary phase. In such environments, growth rate and size control  
8 is governed by trade-offs between prioritization of biomass accumulation or division, and results in the  
9 uncoupling of single-cell growth rate from population growth rate out of steady-state. Specifically, our  
10 model predicts that cells transiently prioritize ribosome production, and thus biomass accumulation, over  
11 production of division machinery during nutrient upshift, explaining experimentally-observed size control  
12 behaviors. Strikingly, our model predicts the opposite behavior during downshift, namely that bacteria  
13 temporarily prioritize division over growth, despite needing to upregulate costly division machinery and  
14 increasing population size when nutrients are scarce. Importantly, when bacteria are subjected to pulsatile  
15 nutrient concentration, we find that cells exhibit a transient memory of the previous metabolic state due to  
16 the slow dynamics of proteome reallocation. This phenotypic memory allows for faster adaptation back to  
17 previously-seen environments when nutrient fluctuations are short-lived.

18

## 19 **Introduction**

20 In their natural environment, bacteria must be able to sense and adapt rapidly to time-varying environmen-  
21 tal stressors to survive and proliferate. Not surprisingly, bacteria exhibit tight regulatory control over their  
22 growth physiology and cell morphology [1, 2], and alter both in response to fluctuating nutrient perturba-  
23 tions, resulting in dynamic growth rate and cell size changes in time-varying environments [3–6].

24 Significant research has gone into understanding how bacterial cell size is coupled to growth rate [7],  
25 DNA replication [8, 9], and gene expression [10] at steady-state, and how size homeostasis is maintained

\* Correspondence: shiladtb@andrew.cmu.edu

26 despite division and growth rate noise [11, 12]. In addition, characterization of a large portion of the steady-  
27 state bacterial proteome across different growth conditions has improved understanding of the resource  
28 allocation strategies employed by bacteria in different environments [13–15]. Motivated by experimental  
29 data, various coarse-grained models of cell physiology have been developed in recent years, which explain  
30 the regulation of cellular growth rate and cell size control from underlying proteome allocation strategies at  
31 steady-state [10, 16–19]. However, bacteria do not exist naturally in such conditions, but instead thrive in  
32 rapidly changing environments. As a result, it remains unclear how cells sense changes in the environment  
33 and dynamically regulate division and growth in response.

34 Bacteria reallocate their proteome to relieve metabolic or translational bottlenecks and increase growth  
35 rate under a given nutrient limitation [20], but do not always allocate resources in order to optimize steady-  
36 state growth rate [21]. For example, bacteria maintain a fraction of inactive ribosomes at steady state  
37 regardless of nutrient condition, presumably as a reserve which can be deployed to quickly increase growth  
38 rate during nutrient upshift [4, 22]. This apparent strategy highlights the challenges of resource allocation  
39 in dynamic environments, specifically that organisms must weigh the trade-offs between optimizing growth  
40 rate at steady-state and employing mechanisms that are costly at steady-state but that hasten adaptation  
41 to environmental changes [4, 23]. In addition, the molecular mechanisms connecting dynamic resource  
42 allocation to division control in bacteria are not clear, nor is our understanding of how these allocation  
43 strategies are affected by the temporal pattern of environmental fluctuations. Furthermore, it is not clear if  
44 bacterial size modulation is simply a byproduct of the complex cellular response to changing environmental  
45 conditions, or if it serves as an adaptive mechanism employed by the cell to improve fitness in time-varying  
46 environments.

47 To understand the dynamics of bacterial growth physiology and size control in dynamic nutrient en-  
48 vironments, we have developed a coarse-grained proteome sector model which connects gene expression  
49 to growth rate and division control, and accurately predicts the cell-level *E. coli* response to nutrient per-  
50 turbations in both exponential and stationary phase seen in experimental data [5, 24]. This is done by  
51 integrating the dynamics of biochemical elements such as amino acids, ribosomes, and metabolic enzymes  
52 with decision-making rules for cell division. We applied this model to study how cells allocate intracellular  
53 resources dynamically in response to time-varying nutrient conditions, and found that growth rate and cell  
54 size control is governed by dynamic trade-offs between biomass accumulation and cell division. Specif-  
55 ically, our model predicts that bacteria temporarily divert resources to ribosome production over division  
56 protein production during nutrient upshift, resulting in a temporary delay in division and an overshoot in  
57 added cell volume per generation as cells prioritize biomass accumulation. Conversely, in response to  
58 nutrient downshift, cells prioritize division over growth, resulting in a rapid decrease in added volume

59 and interdivision time before relaxing to their steady-state values. As a result, population and single-cell  
60 growth rates uncouple outside of steady-state, potentially serving as an adaptive mechanism in time-varying  
61 environments. Lastly, when simulating pulsatile nutrient conditions, we find that growth rate and cell size  
62 recovery time after pulse cessation both increase with increasing pulse duration. Our model suggests that  
63 this transient memory of previous environments is a result of the slow dynamics of proteome reallocation,  
64 and provides a passive mechanism for faster adaptation in fluctuating environments.

65

## 66 **Results**

### 67 **Dynamic proteome allocation in time-varying nutrient environment**

68 Bacterial cells integrate time-varying environmental information through a complex set of regulatory net-  
69 works to control gene expression. Despite this complexity, steady-state proteomics reveals that the expres-  
70 sion of proteins with similar function are regulated reciprocally in response to growth rate perturbations,  
71 such that various proteome sectors can be defined which coarse-grain the cellular milieu into a limited  
72 number of collective state variables [13–15]. To investigate *E. coli* cell size and growth rate control in time-  
73 varying nutrient environments, we developed a dynamic model which coarse-grains the proteome into four  
74 sectors: ribosomal, metabolic, division, and "housekeeping" (Figure 1A). In this framework, the environ-  
75 ment contains time-varying nutrients with concentration  $c$ , which the cell imports and converts into amino  
76 acids using metabolic proteins with protein mass fraction  $\phi_P$ . We assume that the kinetics of protein transla-  
77 tion are limited by the abundance of multiple metabolites, and so coarse-grain amino acid abundance into a  
78 single group of amino acid precursors, with mass fraction  $a$ . These precursors are consumed by translating  
79 ribosomes, with mass fraction  $\phi_R$ , to synthesize each of the four proteome sectors. As a result, the ribosome  
80 mass fraction sets the cellular exponential growth rate,  $\kappa = d \ln M / dt = d \ln V / dt$ , such that growth rate is  
81 defined as

$$82 \quad \kappa = \kappa_t(a)(\phi_R - \phi_R^{\min}) - \mu_{\text{ns}}, \quad (1)$$

83 where  $\phi_R^{\min}$  denotes the fraction of ribosomes which are not actively engaged in translation, and  $\kappa_t(a)$  is  
84 the translational efficiency, which is dependent on amino acid availability such that translation becomes  
85 significantly attenuated at low intracellular amino acid levels (see Supporting Information Section I). Here  
86 we also coarse-grain the effects of protein turnover and assume that it is governed by a constant, nonspecific  
87 degradation rate constant,  $\mu_{\text{ns}}$ .

88 In response to changes in nutrient availability, the cell reallocates its proteome by altering the fraction  
89 of translational flux,  $J_i(t) = \kappa_t(\phi_R(t) - \phi_R^{\min})$ , devoted to each sector, such that the time dynamics of each

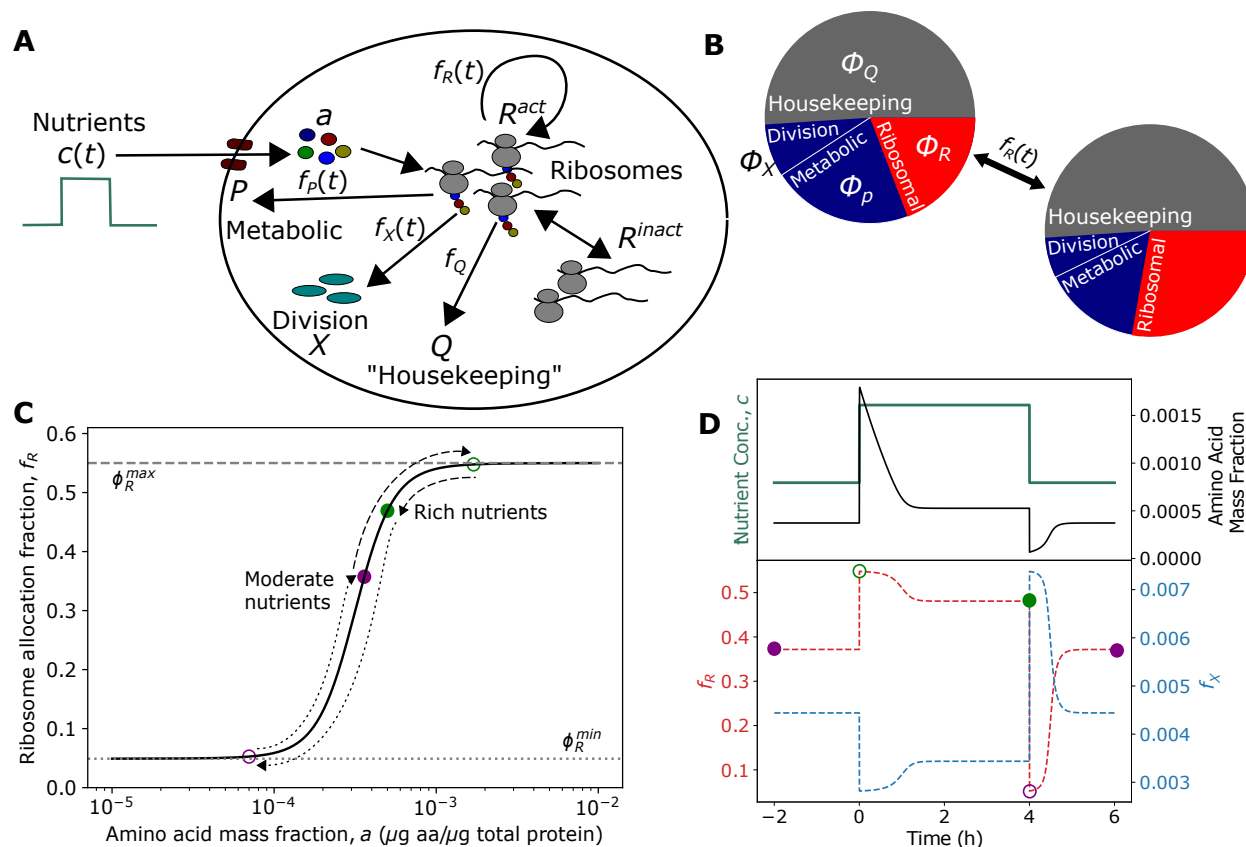

**Figure 1. Dynamic resource allocation model for cell growth and division control in dynamic environments.** (A) Schematic of coarse-grained model of bacterial cell size control and growth physiology. Nutrients ( $c$ ) are imported by metabolic proteins ( $P$ ) and converted to amino acid precursors ( $a$ ), which are then consumed by ribosomes ( $R$ ) to produce proteins via translation. Division occurs once a threshold amount of division proteins ( $X$ ) have been accumulated. (B) By dynamically regulating the fraction of the total translational flux devoted to each proteome sector  $i$ ,  $f_i(a(t))$ , in response to changes in  $a$  triggered by environmental changes, the cell alters its proteome composition, and thus its size and growth rate. (C) The dependence of  $f_R$  on  $a$  is the given by their steady-state relationship. The path of  $f_R$  in response to a nutrient-rich pulse is shown with colored circles corresponding to the timepoints shown in (D).  $f_R$  is initially given by its steady-state value in poor media (purple, closed). A shift to rich media results in a transient increase in  $f_R$  close to its maximum value (green, open), before relaxing back to its new steady-state value (green, closed). The path during upshift is given by the dashed line. A shift back to poor media results in a temporary drop in  $f_R$  close to its minimum value (purple, open), before relaxing back to the original steady-state value (purple, closed). The path during downshift is given by the dotted line. (D) Representative dynamics of amino acid mass fraction (top) and proteome allocation fractions (bottom) during a nutrient pulse. See Table I for a list of parameters.  $f_X$  is calculated by assuming that division timing is set by the protein FtsZ (see Supporting Information section V).

90 sector can be written as

$$91 \quad \frac{d}{dt} \boldsymbol{\phi}(t) = J_t(t)(\mathbf{f}(t) - \boldsymbol{\phi}(t)), \quad (2)$$

92 where the vectors  $\boldsymbol{\phi}(t) = [\phi_R(t), \phi_P(t), \phi_X(t), \phi_Q(t)]$  and  $\mathbf{f}(t) = [f_R(t), f_P(t), f_X(t), f_Q(t)]$  denote the protein  
93 mass fraction and translational flux allocation fraction of each sector at time  $t$ , respectively. Proteomics data  
94 from *E. coli* reveal that a significant fraction of the proteome is invariant to environmental perturbations  
95 [13]. As a result, we define the "housekeeping" sector such that it contains all the proteins whose proteome  
96 allocation is not growth rate dependent. Consequently, the mass fraction,  $\phi_Q$ , and allocation fraction,  $f_Q$ ,  
97 are equal and remain constant. This assertion constrains the dynamics of flux allocation such that  $f_R(t) +$   
98  $f_P(t) + f_X(t) = 1 - f_Q = \phi^{\max}$ .

99 To model division control, we employ a threshold accumulation model of cell division in which division  
100 is triggered after a cell accumulates a fixed number of division proteins (collectively referred to as X pro-  
101 teins) [10, 17, 25, 26]. Since the total protein abundance per cell scales with growth rate [7, 8] and if the  
102 threshold remains constant [5], the average protein mass fraction of division proteins per cell necessarily  
103 decreases to maintain the constancy of the threshold, and thus must be part of the metabolic sector [12, 17].  
104 Consequently, we assume that allocation to the division sector,  $f_X(t)$ , is given by a linear combination of  
105 a basal allocation fraction,  $\beta$ , and a time-dependent fraction,  $f_X^\alpha(t)$ , whose expression is co-regulated as  
106 part of a larger metabolic sector,  $f_P^*(t) = \phi_R^{\max} - f_R(t)$ . As a result, the flux allocation constraint can be  
107 simplified such that  $\phi_R^{\max} = \phi^{\max} - \beta$ , where  $\phi_R^{\max}$  represents the upper limit to allocation fraction devoted  
108 to ribosomal proteins. Using the simplified constraint,  $f_X(t)$  can be expressed such that its time dependence  
109 is solely through  $f_R(t)$ , yielding

$$110 \quad f_X(t) = \alpha(\phi_R^{\max} - f_R(t)) + \beta, \quad (3)$$

111 where  $\alpha$  is the fraction of the co-regulated sector  $f_P^*(t)$  made up of division proteins. From Eq. (3), we  
112 see that when the fraction of cellular resources allocated to ribosome production increases, metabolic and  
113 division protein translational flux is necessarily downregulated, and vice versa (Figure 1B). This highlights  
114 the trade-off that cells must make between biomass accumulation and division in dynamic environments.

115 Critically, as all other proteome sectors are defined in terms of  $f_R(t)$ , the time-dependence of  $f_R$  must  
116 be specified. To do so, we assume that dynamic reallocation is driven by gene-regulatory networks which  
117 are dependent on the amino acid pool, such that the time dependence of  $f_R$  is given through its dependence  
118 on the time-varying amino acid mass fraction  $a$ , thus  $f_R(t) = f_R(a(t))$ . The dynamics of  $a$  are coupled to  
119 Eq. (2) and are given by the difference in the metabolic and translational fluxes, such that  $da/dt = J_n - J_t$ ,  
120 where the metabolic flux,  $J_n$ , is proportional to the metabolic sector mass fraction,  $\phi_P$ . Using the proteome

121 constraint relationship above, the dynamics of  $a$  can be written in terms of the proteome mass fractions,  
122 such that

$$123 \quad \frac{da}{dt} = \kappa_n(a)(\phi^{\max} - \phi_R - \phi_X) + \mu_{\text{ns}} - \kappa_t(a)(\phi_R - \phi_R^{\min}), \quad (4)$$

124 where  $\kappa_n(a)$  is the nutritional efficiency (see Supporting Information Section I), and is dependent on  $a$  such  
125 that nutrient import becomes significantly attenuated at high values of  $a$  to reflect end-product inhibition of  
126 biosynthesis pathways and inactivation of nutrient importers at high intracellular amino acid concentrations  
127 [27].

128 Changes in environmental nutrient availability result in a flux imbalance which alters the size of the  
129 amino acid pool. In this way,  $a$  acts as a read-out of flux imbalance, and so by altering proteome allocation  
130 in response to  $a$ , the cell can dynamically respond to nutrient changes. To obtain the functional form of  
131  $f_R(a(t))$ , we assume that  $a(t)$  sets the allocation fraction  $f_R(a(t))$  via the steady-state relation  $f_R^*(a)$ , such  
132 that  $f_R(a(t)) = f_R^*(a(t))$ . Furthermore, we assume that the cell maximizes translational flux at steady-state,  
133 which allows us to express  $f_R$  solely in terms of the amino acid mass fraction,  $a$ .  $f_R^*(a)$  is shown graphically  
134 in Figure 1C, and predicts that proteome allocation is altered to reduce growth bottlenecks. Namely, when  
135  $a$  is high, ribosome synthesis is prioritized in order to increase translation flux, but when  $a$  is low, metabolic  
136 protein synthesis is prioritized to increase nutrient import. Mathematically, any monotonically increasing  
137 function for  $f_R(a)$  will produce this type of regulatory behavior. However, by choosing  $f_R(a)$  to be given by  
138  $f_R^*(a)$ , we also ensure that translational flux is maximized at steady-state. This assumption of growth-rate  
139 maximization at steady-state has proved fruitful in previous theoretical models to explain bacteria growth  
140 laws [16, 27–31], and has been observed experimentally to be the case for many nutrient-limiting conditions  
141 [21]. Furthermore, it has been experimentally observed that *E. coli* cells evolve their metabolism towards a  
142 state that maximizes growth rate [32–34].

143 Using the above framework, the dynamics of proteome allocation can be simulated in time-varying  
144 nutrient environments by numerically solving the coupled Eqs. (2) and (4) (Figure 1D). In response to a  
145 pulse of nutrients, allocation to ribosome synthesis increases drastically to its maximum value before slowly  
146 relaxing to its steady-state value in rich nutrients (Figure 1D). In contrast, allocation to division protein syn-  
147 thesis drops significantly before slowly relaxing to a lower steady-state value. Following cessation of the  
148 nutrient-rich pulse, the opposite trends occur for each allocation fraction, resulting in an overshoot in  $f_X$  and  
149 undershoot in  $f_R$  before both returning to their initial values (Figure 1D). Mechanistically, this regulation  
150 of ribosome expression is carried out by the signaling molecule guanosine tetraphosphate (ppGpp). ppGpp  
151 is synthesized when charged tRNA levels are low [35, 36]. As charged tRNA abundance is proportional  
152 to amino acid levels, ppGpp thus indirectly acts as a sensor of the amino acid pool. As a result, amino

153 acid abundance is inversely proportional to ppGpp concentration, such that  $[\text{ppGpp}] \propto 1/a$ . In response to  
154 decreased amino acid levels, ppGpp levels increase and repress rRNA expression [35, 36]. Free ribosomal  
155 proteins, which can no longer bind rRNA, bind to their own mRNA and suppress additional ribosome  
156 translation [37]. Conversely, when amino acids are abundant, ppGpp levels decrease which de-represses  
157 ribosome production. In this way, the cell is able to regulate gene expression, and thus translational flux, by  
158 responding to changes in amino acid concentration.

159

## 160 **Growth-rate dependent increase in cell size arises from trade-off between biomass accumu-** 161 **lation and division protein synthesis**

162 To test the validity of our resource allocation model, we first examined if the model can reproduce ex-  
163 perimentally observed steady-state physiological behaviors of bacterial cells, in particular the increase in  
164 average cell size with growth rate under nutrient perturbations (Figure 2A) [1, 7, 8]. To model cell size  
165 control, the dynamics of proteome allocation must be connected to the dynamics of the total number of  
166 division proteins per cell,  $X(t)$ , as cells divide at  $t = \tau$  after accumulating a fixed number of  $X$  proteins,  
167  $X(\tau) = X_0$ . Using the relation  $X = \phi_X V \rho_c / m_X$ , where  $\rho_c$  is the protein mass density of the cell and  $m_X$  is  
168 the mass of division molecule  $X$ , the dynamics of  $\phi_X$  can be used to identify the dynamics of the fraction of  
169 the total number of division proteins required to trigger cell division,  $\tilde{X} = X/X_0$ ,

$$170 \quad \frac{d\tilde{X}}{dt} = \gamma f_X J_I V - \mu_X \tilde{X}, \quad (5)$$

171 where  $\gamma = \rho_c / X_0 m_X$  and  $\mu_X$  is the degradation rate of the division protein. We thus identify the division  
172 protein synthesis rate per unit volume as  $k_P(t) = \gamma f_X(t) J_I(t)$ . By numerically solving proteome allocation  
173 and volume dynamics in conjunction with the division rules given by Eq. (5), single cell size and growth  
174 rate dynamics can be simulated in fluctuating nutrient environments.

175 At steady-state,  $f_R = \phi_R$  (Eq. 2), allowing the rate of division protein synthesis  $k_P$  to be written solely  
176 as a function of growth rate. In moderate to fast exponential growth conditions, the effects of protein  
177 degradation are negligible. Thus assuming  $\kappa \gg \mu_X$  and  $\kappa \gg \mu_{ns}$ , we arrive at

$$178 \quad k_P(\kappa) = \gamma(\alpha(\Delta\phi - \kappa/\kappa_f) + \beta)\kappa, \quad (6)$$

179 where  $\Delta\phi = \phi_R^{\max} - \phi_R^{\min}$ . When  $\kappa \gg \mu_X$ , this model recapitulates the adder principle employed by *E. coli*  
180 to achieve size homeostasis [12], in which a constant amount of volume,  $\Delta V$ , is added each generation  
181 irrespective of birth size,  $\Delta V \approx V_0 \approx \kappa/k_P$ . We discuss deviations from this size control behavior in slow  
182 growth conditions, when degradation effects become important, in the last Results section. Substituting Eq.  
183 (6) into the expression for birth size yields a novel formulation of the size law [7], which links nutrient-

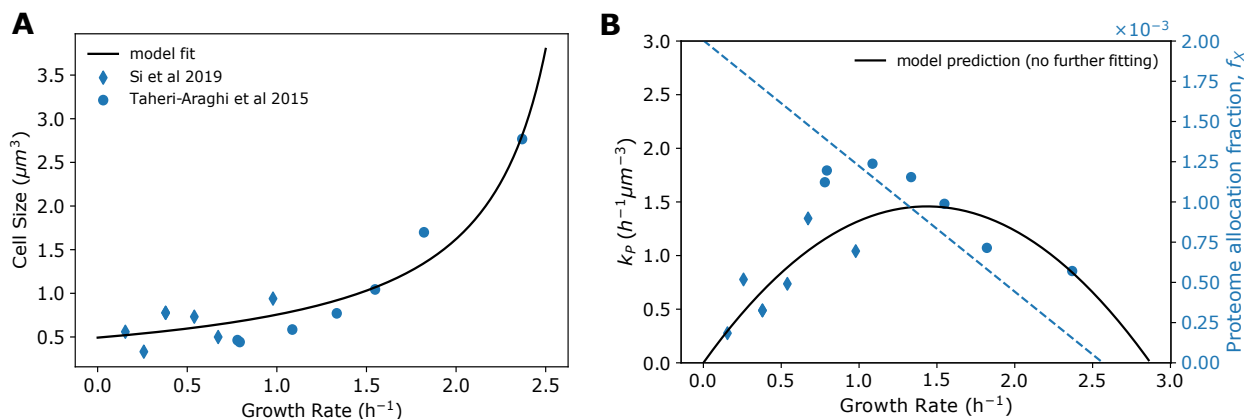

Figure 2. **Growth-rate dependent tradeoff between biomass accumulation and division protein synthesis sets steady-state bacterial cell size.** (A) Steady-state relationship between population average cell size at birth and growth rate. Solid line shows best fit of Eq. (7), yielding parameters  $\gamma\alpha$ ,  $\gamma\beta$ , and  $\kappa_t$ , which are given in Table I. Experimental data are taken from Refs. [8, 12]. (B) Non-monotonic dependence of the division protein production rate,  $k_P$ , on growth rate, where  $k_P$  is estimated from experimental data as  $\langle\kappa\rangle/\langle V_0\rangle$ . Solid line given by Eq. (6), with parameters given by best fit from (A). The allocation fractions to the division protein sector is shown by dotted lines.

184 limited growth rate to cell size (Figure 2A), such that

$$185 \quad V_0(\kappa) = \frac{1}{\gamma\alpha(\Delta\phi - \kappa/\kappa_t) + \gamma\beta} \quad (7)$$

186 By fitting Eq. (7) to experimental data [8, 12] (Figure 2A), we determine the unknown model parameters  $\gamma\alpha$ ,  
 187  $\gamma\beta$ , and  $\kappa_t$  (see Table I), which allows us to numerically predict the dependence of  $k_P$  on  $\kappa$ . Interestingly,  
 188 Eq. (6) predicts a non-monotonic dependence of the division protein production rate on growth rate, which  
 189 is seen in experimental data when considering a wide range of growth rates (Figure 2B). This behavior can  
 190 be understood by considering the effects of both  $f_X$  and  $J_t$ , where here  $J_t = \kappa$  when degradation effects  
 191 are negligible. As growth rate decreases, translational flux allocation to division protein production,  $f_X$ ,  
 192 increases while overall translational flux,  $J_t$ , decreases (Figure 2B). As such, at fast growth rates, decreasing  
 193  $\kappa$  results in an increase in  $k_P$  due to an increase in  $f_X$ . Conversely, at slow growth rates this increase in  $f_X$   
 194 is dominated by the decrease in  $J_t$ , resulting in a reduction in  $k_P$ . At intermediate growth rates translational  
 195 flux and allocation are simultaneously moderately high, consequently yielding the maximum  $k_P$  value.

197 The expression for cell volume given in Eq. (7) predicts a maximum growth rate given by  $\kappa_{\max} =$   
 198  $\kappa_t(\Delta\phi + \beta/\alpha)$ . This theoretical maximum, however, is nonphysical as it assumes that  $f_X = \phi_X = 0$ , which  
 199 is never the case (Eq. 3). Growth rate is maximum when  $\phi_R = \phi_R^{\max}$ , thus giving an upper limit to the  
 200 physical growth rate at  $\kappa_{\max} = \kappa_t\Delta\phi$ . Eq. (7) also implies that there is no bound on cell size. However, our  
 201 expression for  $f_X$  constrains cell size to a finite value. When allocation to ribosomes is maximal,  $\phi_X = \beta$ ,  
 202 such that the maximum birth volume  $V_0$  is given by  $V_0^{\max} = 1/\gamma\beta$ .



203

## 204 **Cells transiently prioritize biomass accumulation over division during nutrient upshifts**

205 Recent experimental results show that in response to nutrient upshift, bacteria transiently delay division  
206 before increasing to a faster division rate in nutrient-rich media [5]. This behavior is seen clearly in the  
207 overshoot in the average interdivision time ( $\tau$ ) and added volume ( $\Delta$ ) (Figure 3C-D). We hypothesized  
208 that this delay in cell division upon nutrient upshift results from cells prioritizing ribosome production  
209 over production of division proteins and metabolic proteins. Using our four-component proteome sector  
210 model, we simulated single-cell growth and size dynamics in response to nutrient upshift, and were able to  
211 quantitatively capture the experimental results (Figure 3A), as well as predict the dynamics of flux allocation  
212 and proteome composition. Importantly, our model was also able to capture growth rate dynamics during  
213 both upshift and downshift in many other experimental conditions examined recently by Erickson et al. [18]  
214 (Supplementary Figure 3).

215 We simulated stochastic single-cell volume trajectories by introducing both growth rate and division  
216 noise during the cell cycle, in which only one daughter cell was tracked after each division event (Figure  
217 3A, bottom panel; see Supporting Information Section III). The single-cell level simulations quantitatively  
218 capture the average value and noise profile of added volume ( $\Delta$ ), volume ratio ( $\Delta/V_0$ ), and the interdivision  
219 time ( $\tau$ ) dynamics seen experimentally (Figure 3B-D). In particular, the simulations reproduce the over-  
220 shoot in added volume and interdivision time following the nutrient upshift. As hypothesized, our model  
221 predicts that in response to increased nutrient availability, bacteria transiently divert resources away from  
222 division and metabolic protein production and instead prioritize ribosome production. This regulatory be-  
223 havior occurs because an increase in nutrient availability transiently causes a mismatch in the translational  
224 and metabolic fluxes, yielding a significant increase in the size of the amino acid pool,  $a$ . In response to  
225 the increase in  $a$ , the cell allocates translational flux to ribosome production at the expense of division and  
226 metabolic protein production (Figure 1C-D). This is seen in the temporary drop in division protein produc-  
227 tion rate,  $k_P$ , and overshoot in ribosomal flux allocation,  $f_R$ , during the time period during which growth  
228 rate increases, before both  $k_P$  and  $f_R$  relax to their new steady-state values (Figure 3A). Consequently, dur-  
229 ing this transitional period, bacteria delay division and add significantly more biomass than their birth size  
230 (Figure 3B). Importantly, a model in which division protein allocation is constant could not reproduce the  
231 observed experimental results, and instead predicted that cell size is invariant to nutrient perturbations (Sup-  
232 plementary Figure 4).

233

## 235 **Growth-rate and cell size recovery time increases with nutrient pulse duration**

236 In order to predict bacterial growth rate and cell size control in more complex time-varying environments,

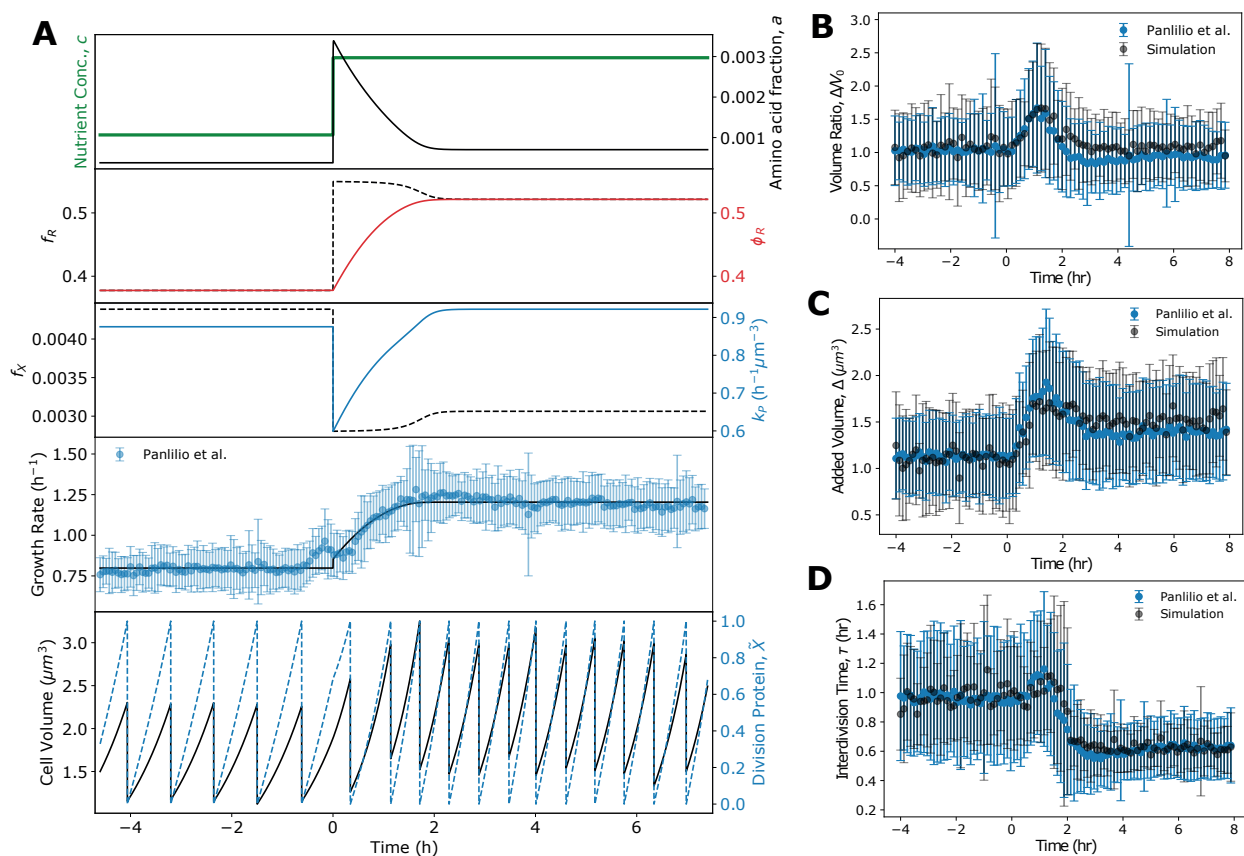

Figure 3. **Cell size and division dynamics during nutrient upshift.** (A) Simulation dynamics of average amino acid mass fraction, proteome composition, allocation fraction, and division protein production for *E. coli* cells experiencing nutrient upshift. Model parameters obtained by fitting growth rate dynamics to experimental data [5], and are provided in Table I. Bottom: Single-cell volume trajectories were simulated using the model by implementing division rules appropriate for *E. coli*. (B-D) Generation-averaged dynamics of cell volume ratio (B), added volume (C), and interdivision time (D) from single-cell volume trajectories agree well with experimental data. Error bars indicate the standard deviation of the time-binned mean for all time series.

237 we simulated single-cell trajectories experiencing a pulse of nutrient-rich media with duration  $\tau_{\text{feast}}$ . For  
 238 each trajectory with pulse-length  $\tau_{\text{feast}}$ , we measured the time required ( $\tau_{\text{recovery}}$ ) for both the growth rate  
 239 and cell volume added per generation to return to the pre-shift level following downshift (Figure 4A,B). In-  
 240 terestingly, in both cases  $\tau_{\text{recovery}}$  increased with increasing  $\tau_{\text{feast}}$  until saturating at a constant value (Figure  
 241 4D), showing that bacteria transiently retain memory of the previous nutrient environment across gener-  
 242 ations, allowing for quicker recovery to optimal steady-state growth when experiencing short timescale  
 243 perturbations in nutrient quality. As cellular growth rate is determined by ribosome abundance (Eq. 1), we  
 244 hypothesized that this phenotypic memory is conferred by the slow dynamics of proteome reallocation and  
 245 thus ribosome accumulation, which occur on a significantly slower timescale than translational flux reallo-

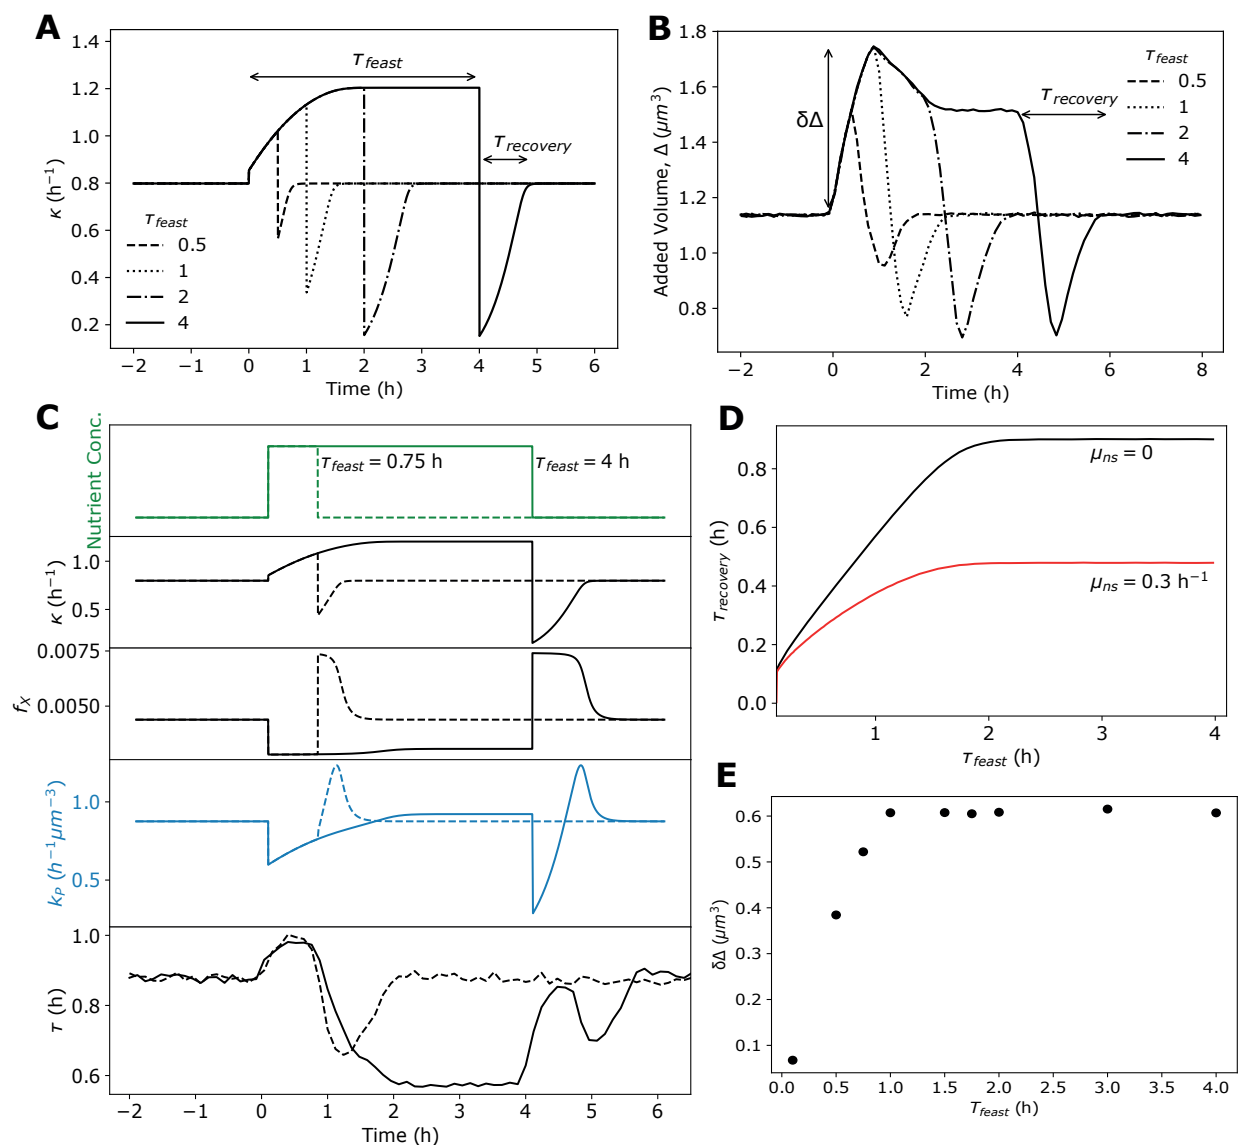

Figure 4. **Proteome reallocation and cell size regulation in pulsatile nutrient environment.** (A) Average single-cell growth rate simulations of bacteria experiencing a nutrient-rich pulse of duration  $\tau_{\text{feast}}$ . For each trajectory with pulse-length  $\tau_{\text{feast}}$ , the time required following downshift for the growth rate to return to within 99% of the pre-shift level was measured, given by  $\tau_{\text{recovery}}$ . (B) Average dynamics of added volume,  $\Delta$ , for 300 single-cell trajectories experiencing a nutrient-rich pulse as shown in (A). The time required to stabilize at the initial added volume after pulse cessation is again given by  $\tau_{\text{recovery}}$ . (C) Example dynamics of simulation where  $\tau_{\text{feast}} = 0.75$  h, and  $\tau_{\text{feast}} = 4$  h. In both cases, the top four panels are deterministic simulations of average intracellular dynamics, whereas the bottom panel is the average dynamics of 300 single-cell stochastic simulations. (D) Quantification of the relationship of  $\tau_{\text{feast}}$  and  $\tau_{\text{recovery}}$  from the simulations in (A) for two different degradation rates. (E) Quantification of the relationship of  $\tau_{\text{feast}}$  and  $\tau_{\text{recovery}}$  from the simulations in (B). See Table I for a list of model parameters.

246 cation due to the half-life of proteins far exceeding that of mRNA [38]. As such, even though translation  
247 proceeds largely at the same rate as transcription in bacteria [39], the stability of previously translated genes  
248 allows for transmission of previous metabolic information across time by increasing the time required to  
249 reshape proteome composition [23]. In agreement with this hypothesis, we found that the time period over  
250 which cells maintain a memory of the previous state is equal to the time required to reshape the proteome to  
251 become optimal in the new environment (Figures 3A and 4D). In addition, simulations were repeated while  
252 including the nonspecific degradation rate,  $\mu_{ns}$ , and the increase in protein turnover resulted in a reduction in  
253 the recovery time and the duration of the phenotypic memory (Figure 4D). These results show that the delay  
254 between translational flux reallocation and reorganization of the proteome incurs a short term fitness cost  
255 by slowing adaptation, but confers a fitness advantage in fluctuating conditions as it allows cells to quickly  
256 return to optimal growth in the previous condition if the nutrient perturbation is short-lived. This phenotypic  
257 memory is also predicted to occur during starvation (Supplemental Figure 5), and is seen experimentally  
258 [40].

259 As with  $\tau_{\text{recovery}}$ , the overshoot in added volume,  $\delta\Delta$ , is also dependent on nutrient pulse length, such that  
260 increasing  $\tau_{\text{feast}}$  increases  $\delta\Delta$  before saturating at a constant value (Figure 4E). This again is a consequence  
261 of the slow dynamics of proteome reallocation and stems from the prioritization of ribosome production  
262 over production of division machinery in response to nutrient upshift. This dynamic allocation strategy  
263 results in delayed division events, and thus an overshoot in added volume.

264

### 265 **Cell division is prioritized over biomass accumulation during nutrient downshift**

266 Following the cessation of the nutrient-rich pulse, our model makes the interesting prediction that division  
267 protein synthesis is prioritized over ribosome production and biomass accumulation during downshift, as  
268 allocation to division protein synthesis transiently becomes maximal at the expense of ribosome allocation  
269 (Figure 1D). This behavior can be understood by recalling that  $f_X$  and  $f_P$  are co-regulated, and that an in-  
270 crease in  $f_X$  necessarily requires a decrease in  $f_R$  (Eq. 3). As a result, there is temporary increase in division  
271 rate (undershoot in  $\tau$ ) caused by an overshoot in  $k_P$  (Figure 4C), while biomass accumulation temporarily  
272 slows (undershoot in  $\kappa$ , Figure 4C), leading to a rapid reduction in cell size (undershoot in  $\Delta$ , Figure 4B).  
273 This prioritization of division protein synthesis is a surprising prediction given that following downshift  
274 cells are experiencing harsher environmental conditions. We propose explanations for this behavior in the  
275 Discussion section.

276 Remarkably, our model predicts distinctly different recovery behavior in interdivision time following  
277 cessation of the nutrient-rich pulse, which is dependent on the time period of the nutrient pulse. This  
278 can be seen clearly by comparing the simulation dynamics of bacteria experiencing nutrient-rich pulses

279 of 0.75 and 4 hrs (bottom panel, Figure 4C). Specifically, cells experiencing longer pulse lengths exhibit  
280 a non-monotonic recovery of interdivision time,  $\tau$ , which is not observed at shorter pulse durations. This  
281 behavior can be understood by considering the impacts of both the overall translational flux ( $J_t = \kappa$ ) and the  
282 division protein allocation fraction ( $f_X$ ) on division protein synthesis rate, given by  $k_P = \gamma J_t f_X$ . Under both  
283 conditions,  $f_X$  behaves similarly immediately following downshift, namely that allocation to division pro-  
284 tein production transiently increases before relaxing to its steady-state value (third panel from top, Figure  
285 4C). As  $k_P$  is proportional to  $f_X$ , at short pulse lengths the increase in  $f_X$  causes an overshoot in  $k_P$  follow-  
286 ing downshift (fourth panel from top, Figure 4C). Importantly, there is a temporary undershoot in growth  
287 rate following downshift under both conditions, however the magnitude of this growth rate undershoot is  
288 significantly larger at longer pulse lengths (second panel from top, Figure 4C) due to a greater mismatch  
289 in metabolic and translational fluxes. As  $k_P$  is also proportional to  $\kappa$ , at longer pulse lengths the initial  
290 drop in  $k_P$  is due to a temporary halt of translation. This is followed by a translation flux ramp-up in which  
291 division is prioritized, resulting in a temporary overshoot in  $k_P$ , and an overall non-monotonic recovery  
292 behavior in  $\tau$ . Importantly, when the quality of the nutrient-rich media is reduced but the pulse length  
293 remains long, there is a reduced growth rate undershoot following pulse cessation, and the non-monotonic  
294 recovery in  $\tau$  is not seen (Supplemental Figure 6). Thus, this pulse length-dependent division control is a  
295 direct consequence of the dependence of  $k_P$  on both  $f_X$  and  $\kappa$ .

296

## 297 **Cell size-dependent protein synthesis regulates recovery from stationary phase under pulsed** 298 **nutrient supply**

299 When the environmental nutrient supply has been exhausted, bacteria halt growth and enter stationary phase.  
300 Bacterial division control and size homeostasis behavior is markedly different in stationary phase compared  
301 to exponential phase, and a robust mechanistic model which captures size control dynamics in both phases  
302 of growth is still lacking. As such, we were interested if our model for dynamic proteome allocation would  
303 successfully predict cell size and division control upon exit from stationary phase. Under such conditions,  
304 the effects of protein turnover on cell physiology become crucial [41]. From Eq. (1) we see that although  
305 bacterial growth vanishes in stationary phase ( $\kappa = 0$ ), protein production does not cease completely, but  
306 is balanced by the degradation rate such that the translational flux is given by  $J_t = \mu_{ns} = \kappa_i(\phi_R - \phi_R^{\min})$ .  
307 This implies that a small fraction of ribosomes remain active and that amino acid supply comes solely  
308 from protein turnover. Importantly, division protein production scales with cell volume and persists in  
309 stationary phase, with  $k_P = \gamma f_X \mu_{ns}$ . As a result, the concentration of division proteins,  $c_X$ , at steady-state in  
310 stationary phase is set by the relative rates of protein production and degradation, namely  $c_X = k_P X_0 / \mu_X$ ,  
311 predicting that cells maintain a constant concentration of division proteins in stationary phase, regardless of  
312

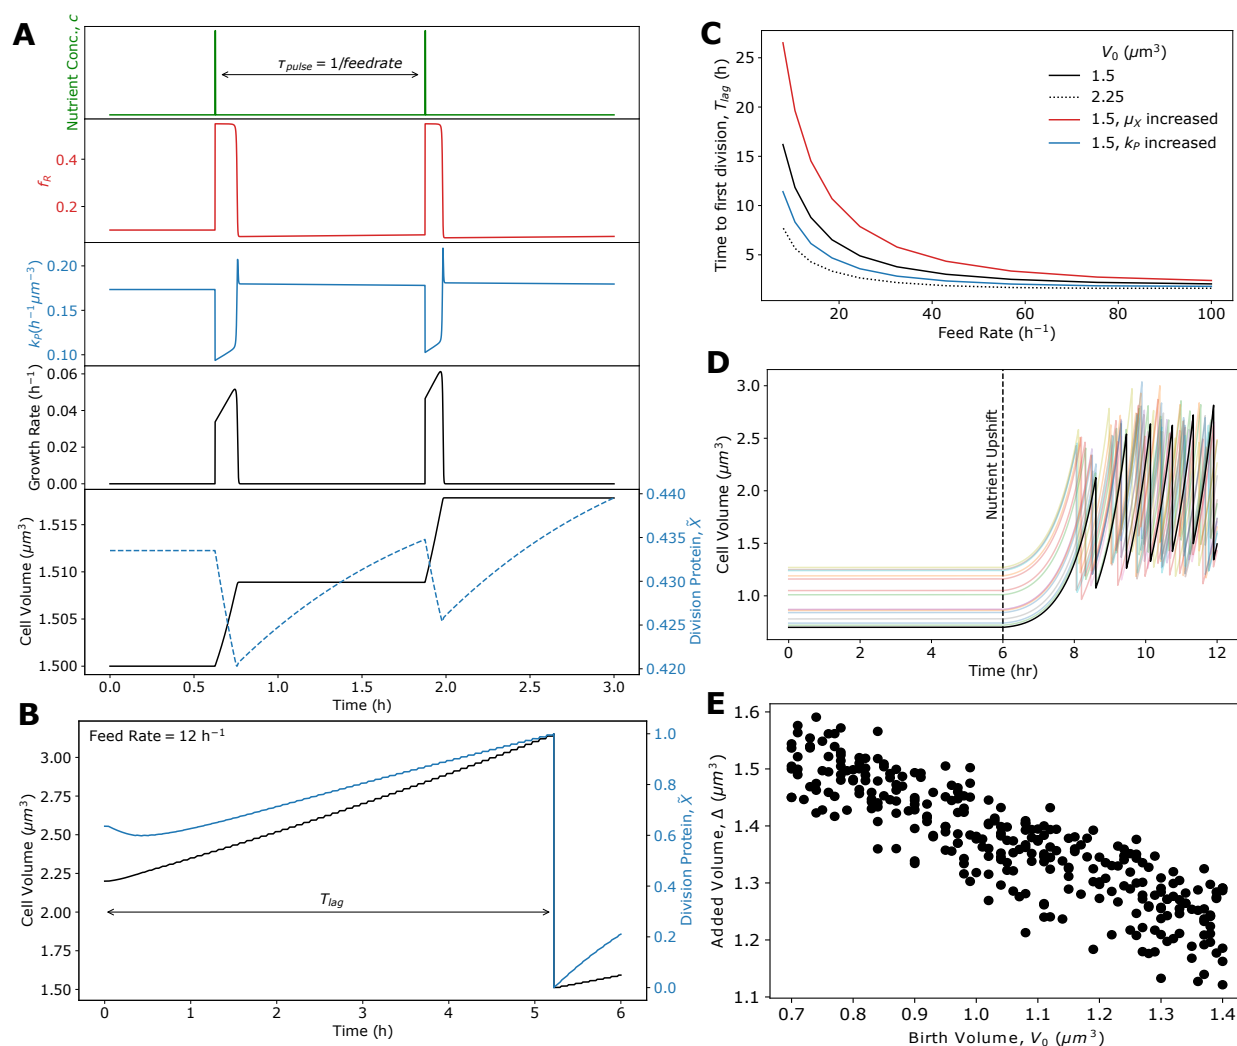

**Figure 5. Cell size and division control during exit from stationary phase.** (A) Single-cell simulation dynamics of ribosome allocation fraction, division protein production, growth rate, volume, and normalized X protein abundance for *E. coli* experiencing pulses of nutrients with delay  $\tau_{\text{pulse}}$  starting from stationary phase. In response to an influx of nutrients, the cell temporarily decreases  $k_p$  in order to produce ribosomes. (B) Cell volume and normalized division protein abundance dynamics for a feed rate of  $12 \text{ h}^{-1}$ . (C) Using the simulation setup shown in (A), the time from pulsing onset until the first division event,  $T_{\text{lag}}$  (example trajectory shown in (B)), was measured as a function of pulse frequency (feed rate) for several initial volumes, degradation rates, and division protein production rates. For increased degradation,  $\mu_X = 1 \text{ h}^{-1}$ . For increased  $k_p$ ,  $\gamma\alpha = 2.875 \mu\text{m}^{-3}$  and  $\gamma\beta = 0.875 \mu\text{m}^{-3}$ . (D) Example single-cell trajectories of cells with randomized initial volumes exited stationary phase via a single nutrient shift (dotted line). (E) Negative correlation between birth volume and added volume shows that *E. coli* exhibit sizer dynamics when exiting stationary phase, which is in agreement with experimental observations [42]. See Table I for a list of model parameters.

313 cell size. Because division is dependent on the total number of division proteins and not its concentration,  
314 we therefore expect larger cells to divide faster upon nutrient exposure.

315 To examine if our model was able to capture cell division dynamics in different growth regimes, we  
316 simulated cell size dynamics of bacterial cells exiting stationary phase (i.e. starting at steady-state when  
317  $\kappa = 0$  and  $c = 0$ ) through pulsatile nutrient exposure of constant duration with a variable separation time,  
318  $\tau_{\text{pulse}}$  (Figure 5A). As an increase in available nutrients results in an increase in the intracellular amino  
319 acid mass fraction (Supplemental Figure 7) [24], our model predicts that bacteria transiently prioritize ribo-  
320 some production over division immediately following pulse exposure, similar to nutrient upshift behavior  
321 predicted in exponential phase (Figure 5A, Figure 3, Supplemental Figure 7). Consequently, immediately  
322 following nutrient influx,  $k_p$  drops and the degradation rate dominates, resulting in a sharp decrease in the  
323 division protein number,  $X$ . Importantly, in the time between pulses,  $X$  increases significantly due to an  
324 increase in the division protein production rate caused by an increase in cell volume. This stands in contrast  
325 to a previous model for division control in stationary phase [24], which assumed that bacteria immediately  
326 allocate resources to division during nutrient upshift, causing the division protein production rate to tran-  
327 siently increase before falling to some basal value if the pulse rate is of insufficient frequency. Despite the  
328 stark differences in molecular details between these models, we find that the time from pulse onset to first  
329 division,  $T_{\text{lag}}$  (Figure 5B), monotonically decreases with increasing feedrate (decreasing  $\tau_{\text{pulse}}$ , Figure 5C),  
330 which is observed experimentally [24]. This behavior occurs because although bacteria initially prioritize  
331 ribosome production over division when exiting stationary phase, once the ribosome bottleneck is relieved,  
332 cells then upregulate division machinery. As a faster feedrate relieves this bottleneck quicker, a faster fee-  
333 drate results in a shorter lag time until division. Also consistent with experimental results [24], we find that  
334 increasing the division protein degradation rate ( $\mu_x$ ) increases  $T_{\text{lag}}$ , while increasing the protein production  
335 rate ( $k_p$ ) decreases  $T_{\text{lag}}$  (Figure 5C), highlighting the importance of the degradation and volume-specific  
336 protein synthesis rates in controlling division timing.

337 As cells in stationary phase maintain a constant concentration of division proteins regardless of size, our  
338 model predicts that  $T_{\text{lag}}$  is dependent on initial volume in stationary phase,  $V_0$ , such that larger cells divide  
339 faster (Figure 5C). Importantly, this dependence of division timing on initial cell size is seen experimen-  
340 tally [42], and is not captured by the model proposed in Ref. [24]. To more specifically investigate size  
341 control mechanisms when exiting stationary phase, we simulated single-cell volume trajectories of bacteria  
342 exiting stationary phase via a single nutrient upshift (Figure 5D; see Supporting Information Section III).  
343 Importantly, we found that the adder model for cell size control did not hold under this growth regime,  
344 but rather cells exhibited sizer-like behavior, which is characterized by the added volume being negatively  
345 correlated with birth volume (Figure 5E). This behavior has been observed experimentally [42], and again

346 can be understood from our threshold accumulation model, now considering the limit when  $\mu_X \gg \kappa$ . In  
347 such environments, bacteria divide once reaching a set size given by  $V_d = \mu_X/k_P$ .

348

## 349 **Discussion**

350 We have developed a coarse-grained proteome sector model which quantitatively captures experimentally  
351 observed growth rate and size control dynamics in response to nutrient upshift in both exponential (Figure 3)  
352 and stationary phases (Figure 5). Our model highlights an important resource allocation trade-off that cells  
353 must make between optimizing for biomass accumulation or division in dynamic nutrient environments. In  
354 response to nutrient upshift, we predict that bacteria prioritize ribosome production in both exponential and  
355 stationary phase, resulting in faster biomass accumulation but delayed division. At the single-cell level, this  
356 results in a transient overshoot in both added volume and interdivision time. Interestingly, when simulating  
357 population level growth dynamics (see Supporting Information Section IV), we find that upshift results in a  
358 temporary reduction in population growth rate (Figure 6). This raises the question, in response to increased  
359 nutrient availability, why do bacteria temporarily slow proliferation? One possible explanation is that by  
360 delaying division, cellular resources are freed up which can be reallocated to quickly alleviate the growth  
361 bottleneck caused by a lack of ribosomes. As a result, cells are optimized for biomass accumulation instead  
362 of population growth, which allows for individual cells to adapt quickly to new environments. A second ex-  
363 planation is that because bacteria can quickly inactivate ribosomes [22] and recycle the amino acids through  
364 degradation, cells prioritize ribosome production as a method of energy storage when the environment is  
365 transiently nutrient-rich. Thus by producing ribosomes in response to nutrient upshift, bacteria simultane-  
366 ously relieve the growth bottleneck caused by lack of ribosomes, while also being able to quickly convert  
367 metabolites into proteins which can be reallocated in the future after the nutrients have been exhausted. This  
368 strategy could allow for bacterial survival in harsher fluctuating environments, when nutrients are few and  
369 far between.

370 With our model able to capture nutrient upshift dynamics, we simulated bacterial growth rate and size  
371 control dynamics in response to pulsatile nutrient exposure to predict how resources are allocated in more  
372 complicated time-varying environments. In such conditions, growth rate recovery time following nutrient  
373 downshift, increased with increasing pulse length (Figure 4), showing that bacteria exhibit a transient mem-  
374 ory of the previous metabolic state. This phenotypic memory arises from the slow dynamics of proteome  
375 reallocation, and although it incurs a short term fitness cost, this passive mechanism can confer a fitness  
376 advantage in fluctuating conditions, as it allows cells to quickly return to optimal growth in the previous  
377 condition if the nutrient perturbation is short-lived.

378 Our simulations also yielded surprising predictions for the size control dynamics following cessation



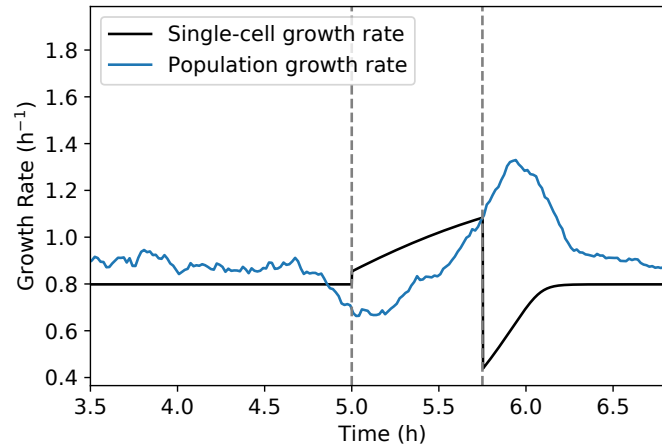

Figure 6. **Cell proliferation dynamics during nutrient up-shift.** Comparison of single-cell growth rate (black) and population growth rate (blue) dynamics in response to nutrient-rich pulse, where the population growth rate is given by the number of cell divisions per time. Dotted lines correspond to the start and end of the nutrient-rich period. See Table I for a list of model parameters.

379 of nutrient-rich exposure (Figure 4C). In particular, our model predicts that bacteria transiently prioritize  
380 production of division proteins over production of ribosomes, resulting in a temporary undershoot in in-  
381 terdivision time and added volume. This result is striking, because it predicts that in response to onset of  
382 harsher environmental conditions, bacteria transiently upregulate the production of costly division machin-  
383 ery instead of prioritizing energy storage. In addition, this prioritization of division results in a temporary  
384 overshoot in population growth rate (Figure 6), meaning that the number of cells that must compete with  
385 each other for nutrients sharply increases in the new, less-favorable, environment. Several potential ex-  
386 planations for this behavior warrant exploration in future experimental and theoretical studies. First, by  
387 increasing division events, cells rapidly decrease cell size and thus increase surface-to-volume ratio [3, 43].  
388 As a higher surface-to-volume ratio results in greater nutrient influx [44, 45], decreasing cell size may  
389 confer an important fitness advantage despite the metabolic cost associated with upregulating division  
390 protein production. Second, bacteria may employ this increased rate of division as a population bet-hedging  
391 strategy which facilitates adaptation to fluctuating environments. Previous work has shown that partitioning  
392 of cellular contents at division is a major determinant of phenotypic heterogeneity [46]. Thus, by transiently  
393 increasing the number of division events, a bacterial population temporarily will exhibit a broader range  
394 of phenotypes. Phenotypic heterogeneity increases in adverse environments in both prokaryotic and eu-  
395 karyotic populations, and previous work has shown that heterogeneity promotes adaptation to time-varying  
396 stress by facilitating development of resistance-conferring mutations and/or by alleviating the fitness cost  
397 of constitutive expression of unnecessary proteins [47–50]. These results suggest that bacterial cells utilize

Table I. Model parameters. See Supporting Information for more details.

| Parameter                               | Description                                                                      | Value     | Growth condition | Figure number |
|-----------------------------------------|----------------------------------------------------------------------------------|-----------|------------------|---------------|
| $\phi_R^{\min}$                         | inactive ribosome fraction [16]                                                  | 0.049     | all              | all           |
| $\phi_R^{\max}$                         | maximum flux allocation to ribosome production [16]                              | 0.55      | all              | all           |
| $a_t$                                   | translation attenuation threshold [27]                                           | $10^{-4}$ | all              | all           |
| $a_n$                                   | feedback inhibition threshold [27]                                               | $10^{-3}$ | all              | all           |
| $\kappa_t^0$ ( $\text{h}^{-1}$ )        | translational efficiency rate constant                                           | 2.6       | all              | 1, 3-6        |
|                                         |                                                                                  | 5.1       | all              | 2             |
| $\kappa_{n,low}^0$ ( $\text{h}^{-1}$ )  | nutritional efficiency rate constant in nutrient-poor media                      | 5.29      | exponential      | 1, 3, 4, 6    |
|                                         |                                                                                  | 0         | stationary       | 5             |
| $\kappa_{n,high}^0$ ( $\text{h}^{-1}$ ) | nutritional efficiency rate constant in nutrient-rich media                      | 10        | all              | 1             |
|                                         |                                                                                  | 62.8      | all              | 3-6           |
| $\mu_{ns}$ ( $\text{h}^{-1}$ )          | nonspecific degradation rate                                                     | 0         | exponential      | 1, 2-4, 6     |
|                                         |                                                                                  | 0.1       | stationary       | 5             |
| $\mu_X$ ( $\text{h}^{-1}$ )             | division protein degradation rate                                                | 0.6       | all              | 1, 3-6        |
| $\gamma\alpha$ ( $\mu\text{m}^{-3}$ )   | fitting parameter, contribution to $k_P$ from co-regulated portion of $f_X$      | 2.3       | all              | 1, 3-6        |
|                                         |                                                                                  | 3.6       | all              | 2             |
| $\gamma\beta$ ( $\mu\text{m}^{-3}$ )    | fitting parameter, contribution to $k_P$ from basal allocation fraction of $f_X$ | 0.7       | all              | 1, 3-6        |
|                                         |                                                                                  | 0.2       | all              | 2             |

398 division control to increase population heterogeneity in response to harsh environmental perturbations, thus  
 399 facilitating adaptation to new environments and conferring increased population fitness in time-varying  
 400 environments.

401

## 402 Author Contributions

403 J.C.K. and S.B. designed and developed the study. J.C.K. carried out the simulations and analyzed the data.

404 J.C.K. and S.B. wrote the article.

405

## 406 Acknowledgements

407 This work was supported by National Institute of General Medical Sciences of the National Institutes of

408 Health under award numbers R35 GM143042 (SB), 5T32 GM133353 (JCK), and the Shurl and Kay Curci  
409 Foundation (SB).

410

## 411 **References**

- 412 [1] S. Jun, F. Si, R. Pugatch, and M. Scott, *Reports on Progress in Physics* **81**, 056601 (2018).
- 413 [2] D. Serbanescu, N. Ojkic, and S. Banerjee, *FEBS Journal* (2021), 10.1111/febs.16234.
- 414 [3] L. K. Harris and J. A. Theriot, *Cell* **165**, 1479 (2016).
- 415 [4] M. Mori, S. Schink, D. W. Erickson, U. Gerland, and T. Hwa, *Nature Communications* **8**, 1 (2017).
- 416 [5] M. Panlilio, J. Grilli, G. Tallarico, I. Iuliani, B. Sclavi, P. Cicutà, and M. C. Lagomarsino, *Proceedings of the*  
417 *National Academy of Sciences* **118** (2021), 10.1073/PNAS.2016391118.
- 418 [6] J. Nguyen, V. Fernandez, S. Pontrelli, U. Sauer, M. Ackermann, and R. Stocker, *Nature Communications* **12**, 1  
419 (2021).
- 420 [7] M. Schaechter, O. Maaløe, and N. Kjeldgaard, *Microbiology* **19**, 592 (1958).
- 421 [8] F. Si, D. Li, S. E. Cox, J. T. Sauls, O. Azizi, C. Sou, A. B. Schwartz, M. J. Erickstad, Y. Jun, X. Li, and S. Jun,  
422 *Current Biology* **27**, 1278 (2017).
- 423 [9] H. Zheng, Y. Bai, M. Jiang, T. A. Tokuyasu, X. Huang, F. Zhong, Y. Wu, X. Fu, N. Kleckner, T. Hwa, and  
424 C. Liu, *Nature Microbiology* **5**, 995 (2020).
- 425 [10] D. Serbanescu, N. Ojkic, and S. Banerjee, *Cell Reports* **32**, 108183 (2020).
- 426 [11] M. Campos, I. V. Surovtsev, S. Kato, A. Paintdakhi, B. Beltran, S. E. Ebmeier, and C. Jacobs-Wagner, *Cell* **159**,  
427 1433 (2014).
- 428 [12] S. Taheri-Araghi, S. Bradde, J. T. Sauls, N. S. Hill, P. A. Levin, J. Paulsson, M. Vergassola, and S. Jun, *Current*  
429 *Biology* **25**, 385 (2015).
- 430 [13] S. Hui, J. M. Silverman, S. S. Chen, D. W. Erickson, M. Basan, J. Wang, T. Hwa, and J. R. Williamson,  
431 *Molecular systems biology* **11**, 784 (2015).
- 432 [14] A. Schmidt, K. Kochanowski, S. Vedelaar, E. Ahrné, B. Volkmer, L. Callipo, K. Knoops, M. Bauer, R. Aeber-  
433 sold, and M. Heinemann, *Nature Biotechnology* **34**, 104 (2016).
- 434 [15] M. Mori, Z. Zhang, A. Banaei-Esfahani, J. Lalanne, H. Okano, B. C. Collins, A. Schmidt, O. T. Schubert, D. Lee,  
435 G. Li, R. Aebersold, T. Hwa, and C. Ludwig, *Molecular Systems Biology* **17** (2021), 10.15252/msb.20209536.
- 436 [16] M. Scott, C. W. Gunderson, E. M. Mateescu, Z. Zhang, and T. Hwa, *Science* **330**, 1099 (2010).
- 437 [17] M. Basan, M. Zhu, X. Dai, M. Warren, D. Sévin, Y. Wang, and T. Hwa, *Molecular Systems Biology* **11**, 836  
438 (2015).
- 439 [18] D. W. Erickson, S. J. Schink, V. Patsalo, J. R. Williamson, U. Gerland, and T. Hwa, *Nature* **551**, 119 (2017).
- 440 [19] F. Bertaux, J. Von Kügelgen, S. Marguerat, and V. Shahrezaei, *PLoS Computational Biology* **16**, e1008245  
441 (2020).
- 442 [20] N. M. Belliveau, G. Chure, C. L. Hueschen, H. G. Garcia, J. Kondev, D. S. Fisher, J. A. Theriot, and R. Phillips,  
443 *Cell Systems* **12**, 924 (2021).
- 444 [21] B. D. Towbin, Y. Korem, A. Bren, S. Doron, R. Sorek, and U. Alon, *Nature Communications* **8**, 1 (2017).

- 445 [22] X. Dai, M. Zhu, M. Warren, R. Balakrishnan, V. Patsalo, H. Okano, J. R. Williamson, K. Fredrick, Y. P. Wang,  
446 and T. Hwa, *Nature Microbiology* **2** (2016), 10.1038/nmicrobiol.2016.231.
- 447 [23] G. Lambert and E. Kussel, *PLoS Genetics* **10** (2014), 10.1371/journal.pgen.1004556.
- 448 [24] K. Sekar, R. Rusconi, J. T. Sauls, T. Fuhrer, E. Noor, J. Nguyen, V. I. Fernandez, M. F. Buffing, M. Berney,  
449 S. Jun, R. Stocker, and U. Sauer, *Molecular Systems Biology* **14**, e8623 (2018).
- 450 [25] K. R. Ghusinga, C. A. Vargas-Garcia, and A. Singh, *Scientific Reports* **6**, 1 (2016).
- 451 [26] F. Si, G. Le Treut, J. T. Sauls, S. Vadia, P. A. Levin, and S. Jun, *Current Biology* **29**, 1760 (2019).
- 452 [27] M. Scott, S. Klumpp, E. M. Mateescu, and T. Hwa, *Molecular Systems Biology* **10**, 747 (2014).
- 453 [28] D. Molenaar, R. Van Berlo, D. De Ridder, and B. Teusink, *Molecular Systems Biology* **5**, 323 (2009).
- 454 [29] P. P. Pandey and S. Jain, *Theory in Biosciences* **135**, 121 (2016).
- 455 [30] N. Giordano, F. Mairet, J. L. Gouzé, J. Geiselmann, and H. de Jong, *PLoS Computational Biology* **12**, 1 (2016).
- 456 [31] Y. K. Kohanim, D. Levi, G. Jona, B. D. Towbin, A. Bren, U. A. Correspondence, and U. Alon, *Cell Reports* **23**  
457 (2018), 10.1016/j.celrep.2018.05.007.
- 458 [32] J. S. Edwards, R. U. Ibarra, and B. O. Palsson, *Nature Biotechnology* **19**, 125 (2001).
- 459 [33] R. U. Ibarra, J. S. Edwards, and B. O. Palsson, *Nature* **420**, 186 (2002).
- 460 [34] N. E. Lewis, K. K. Hixson, T. M. Conrad, J. A. Lerman, P. Charusanti, A. D. Polpitiya, J. N. Adkins,  
461 G. Schramm, S. O. Purvine, D. Lopez-Ferrer, *et al.*, *Molecular Systems Biology* **6**, 390 (2010).
- 462 [35] L. U. Magnusson, A. Farewell, and T. Nyström, *Trends in Microbiology* **13**, 236 (2005).
- 463 [36] C. Wu, R. Balakrishnan, N. Braniff, M. Mori, G. Manzanarez, Z. Zhang, and T. Hwa, *Proceedings of the*  
464 *National Academy of Sciences of the United States of America* **119**, 1 (2022).
- 465 [37] A. M. Fallon, C. S. Jinks, G. D. Strycharz, and M. Nomura, *Proceedings of the National Academy of Sciences*  
466 *of the United States of America* **76**, 3411 (1979).
- 467 [38] L. Herzel, J. A. Stanley, C.-C. Yao, and G.-W. Li, *Nucleic Acids Research* **50**, 5029 (2022).
- 468 [39] M. Zhu, M. Mori, T. Hwa, and X. Dai, *Nature Microbiology* **4**, 2347 (2019).
- 469 [40] A. Jöers and T. Tenson, *Scientific Reports* **6**, 1 (2016).
- 470 [41] L. Calabrese, J. Grilli, M. Osella, C. P. Kempes, M. C. Lagomarsino, and L. Ciandrini, *PLoS Computational*  
471 *Biology* **18**, e1010059 (2022).
- 472 [42] S. Bakshi, E. Leoncini, C. Baker, S. J. Cañas-Duarte, B. Okumus, and J. Paulsson, *Nature Microbiology* **6**, 783  
473 (2021).
- 474 [43] N. Ojkic, D. Serbanescu, and S. Banerjee, *eLife* **8**, e47033 (2019).
- 475 [44] K. D. Young, *Microbiology and Molecular Biology Reviews* **70**, 660 (2006).
- 476 [45] N. Ojkic and S. Banerjee, *Biophysical Journal* **120**, 2079 (2021).
- 477 [46] P. Thomas, G. Terradot, V. Danos, and A. Y. Weiße, *Nature Communications* (2018), 10.1038/s41467-018-  
478 06912-9.
- 479 [47] E. Kussell and S. Leibler, *Science* **309**, 2075 (2005).
- 480 [48] D. Van Dijk, R. Dhar, A. M. Missarova, L. Espinar, W. R. Blevins, B. Lehner, and L. B. Carey, *Nature Commu-*  
481 *nications* **6** (2015), 10.1038/ncomms8972.

- 482 [49] B. M. Martins and J. C. Locke, *Current Opinion in Microbiology* **24**, 104 (2015).
- 483 [50] Z. Bódi, Z. Farkas, D. Nevozhay, D. Kalapis, V. Lázár, B. Csörgő, Á. Nyerges, B. Szamecz, G. Fekete, B. Papp,
- 484 H. Araújo, J. L. Oliveira, G. Moura, M. A. Santos, T. Székely, G. Balázs, and C. Pál, *PLoS Biology* **15**, 1
- 485 (2017).
